# Supplementary material
Source: PubMed Central journal article supplement (PMC5621889)
Supplement: jciinsight-2-78210-s001.pdf [file jciinsight-2-78210-s001.pdf]

# Supplementary Figure 1

**A**

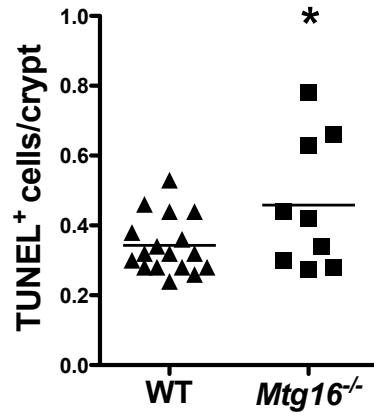

**B**

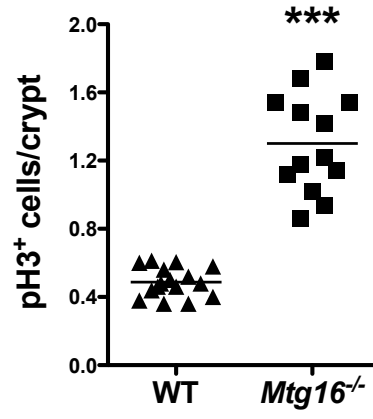

# Supplementary Figure 2

**A**

| Gene   | RNAseq Expression Changes (+ = upreg in <i>Mtg16</i> <sup>-/-</sup> ) |
|--------|-----------------------------------------------------------------------|
| HoxD10 | -4.78                                                                 |
| HoxD11 | -5.6                                                                  |
| Spock3 | -2.82                                                                 |
| Klk15  | -2.42                                                                 |
| Mmp12  | +2.72                                                                 |

**B**

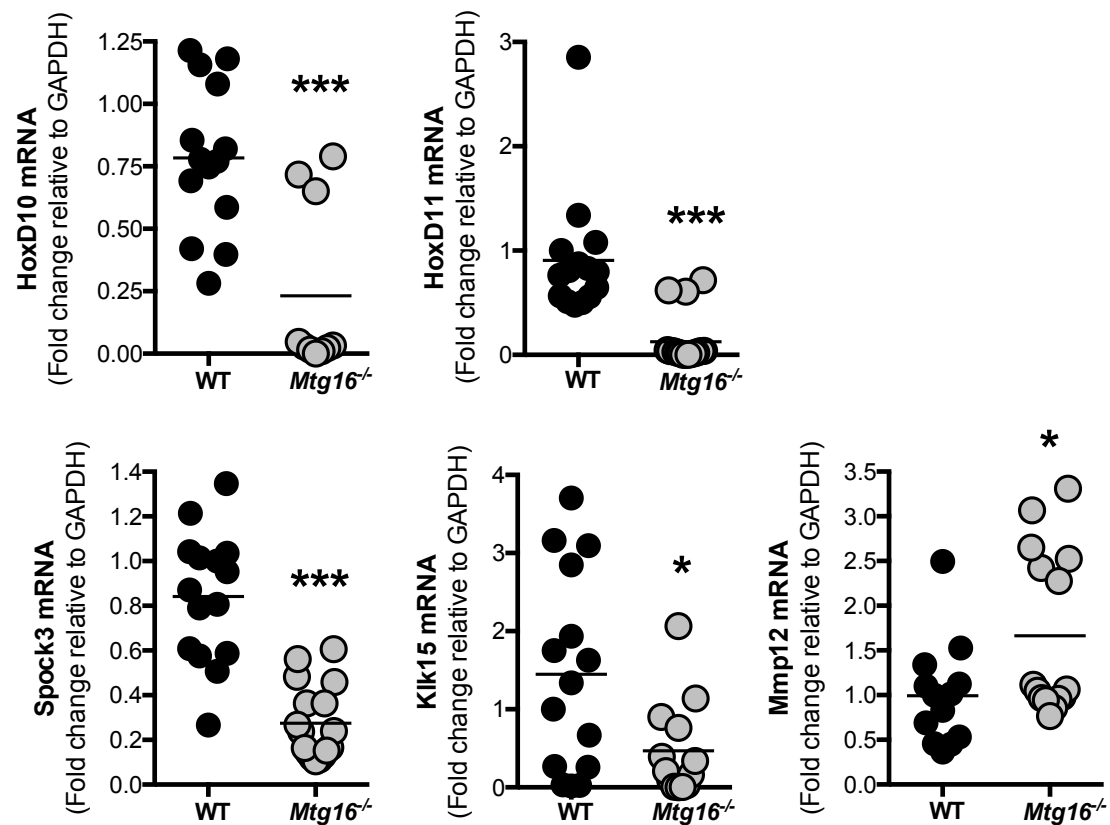

# Supplementary Figure 3

**A**

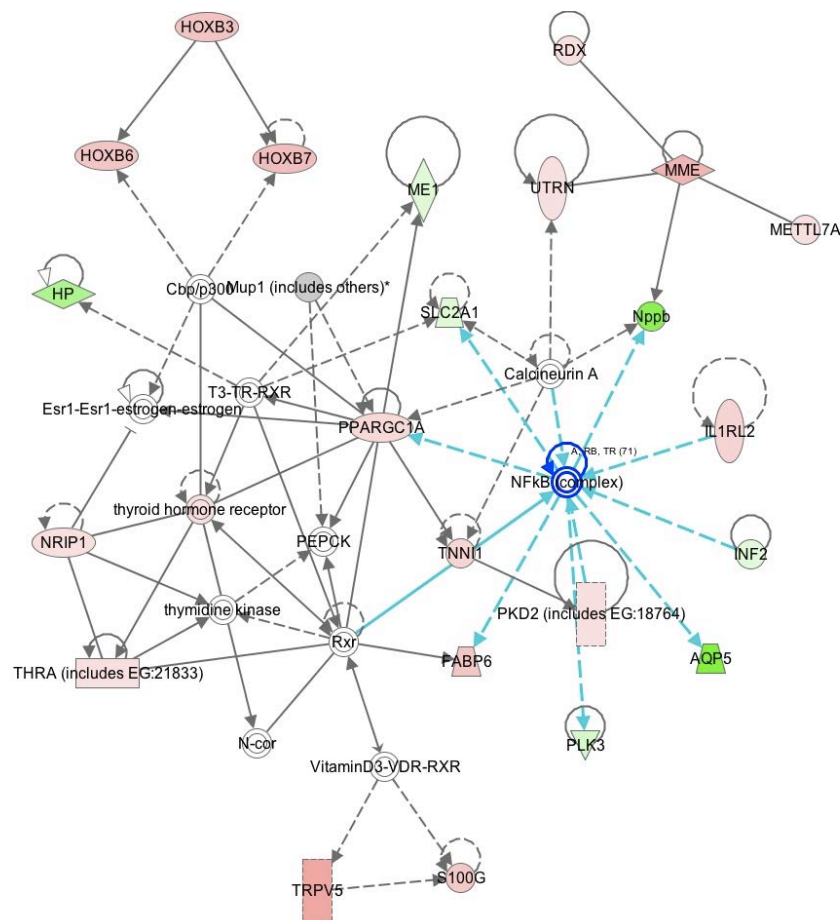

**B**

## Top Networks identified using Ingenuity Pathways Analysis:

- Musculoskeletal development & function, Organismal injury and Cancer
- Connective tissue development & function, Tissue morphology

## Central Nodes:

- NF-Kappa B (NFkB): regulates IL6, TNF, MMPs and PTGS2
- Histone deacetylase: HDAC (regulates TP53, E-cadherin and TNF)
- Ctbp: can activate E-cadherin, TP53, ; binds ZEB1, TCF and HDAC1

## Top Upstream Regulators:

- HOXD9: homeobox D9; regulates HOXD11, HOXD10
- TNF: tumor necrosis factor; regulates NFkB, IL6, MMPs, PTGS2
- IL1B: interleukin 1, beta; regulates PTGS2, NFkB, TNF, MMPs
- CTNNB1: beta-catenin (catenin (cadherin-associated protein), beta 1; regulates MMPs, p16
- ADCYAP1: adenylate cyclase activating polypeptide; regulates TNF, FOS

# Supplementary Figure 4

**A**

**WT**

***Mtg16<sup>-/-</sup>***

**B220**

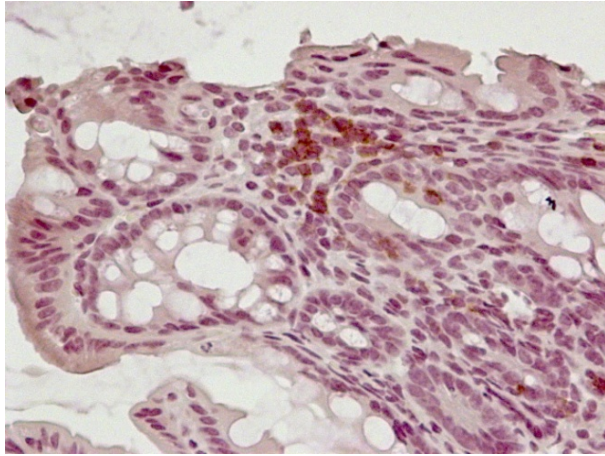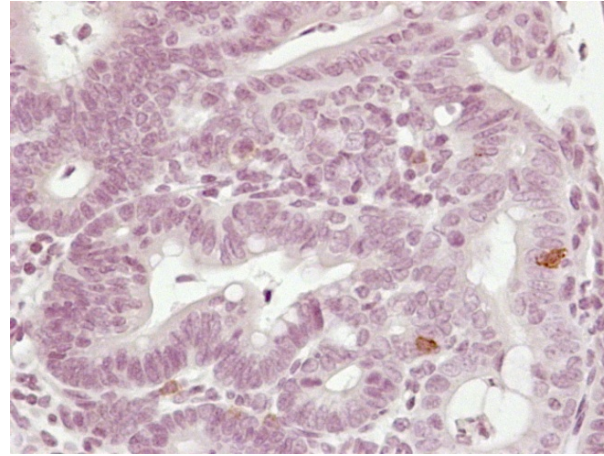

**B**

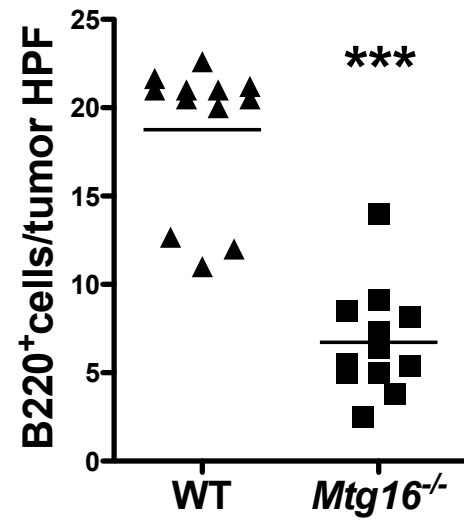

**C**

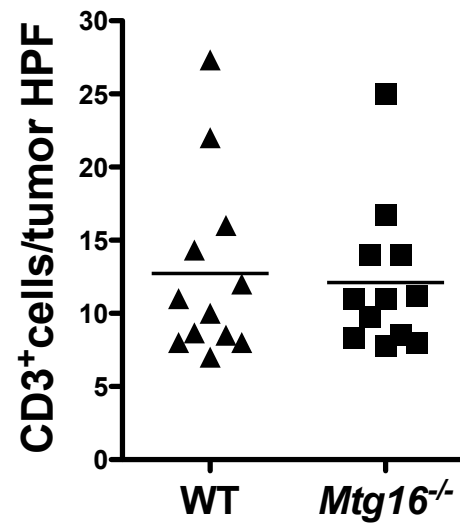

# Supplementary Figure 5

## Normal Colon

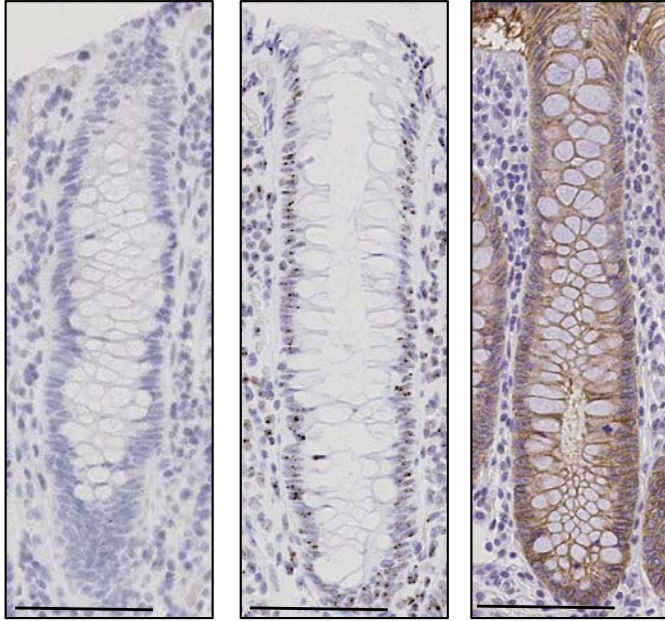

**(-) control**

**asMtg16**

**$\alpha$ Mtg16**

# Supplementary Figure 6

## Spectrum of staining in colitis samples

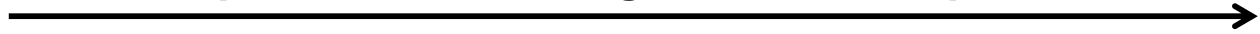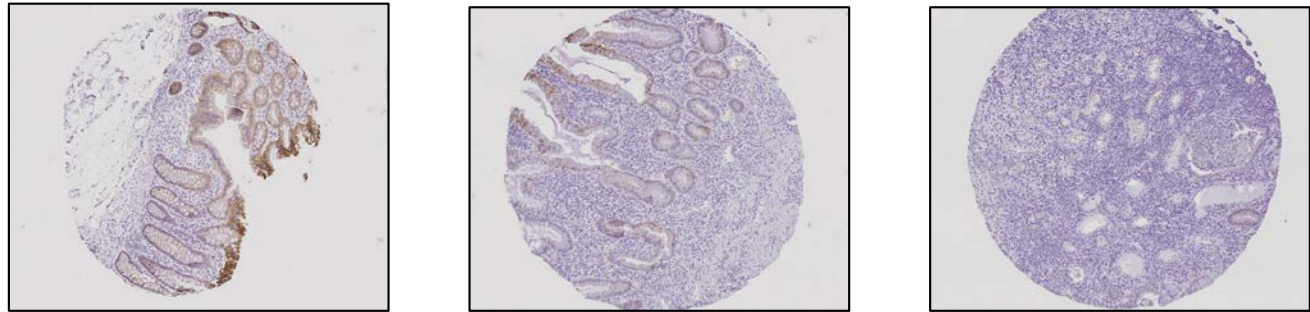

### Normal colon

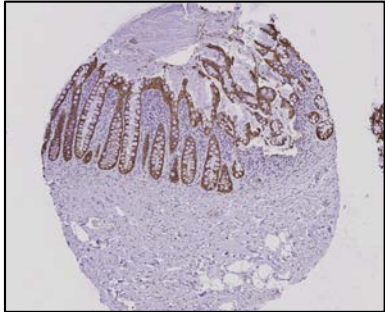

## Spectrum of staining in colitis-associated cancer samples

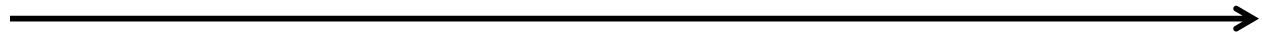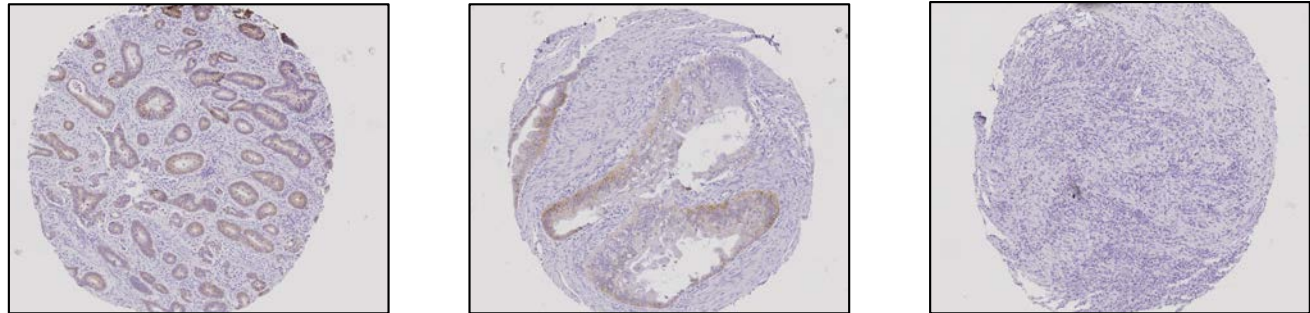

### Normal colon

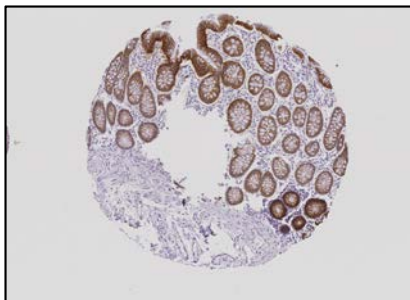

## Spectrum of staining in CRC samples

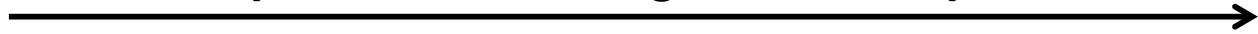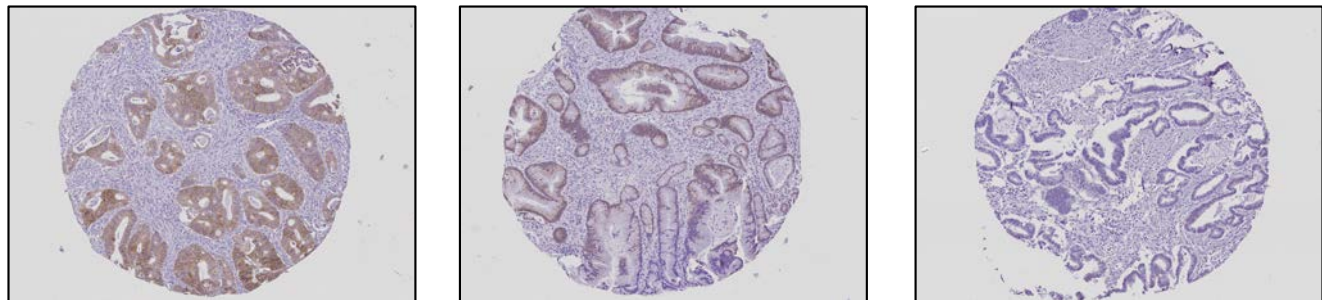

# Supplementary Figure 7

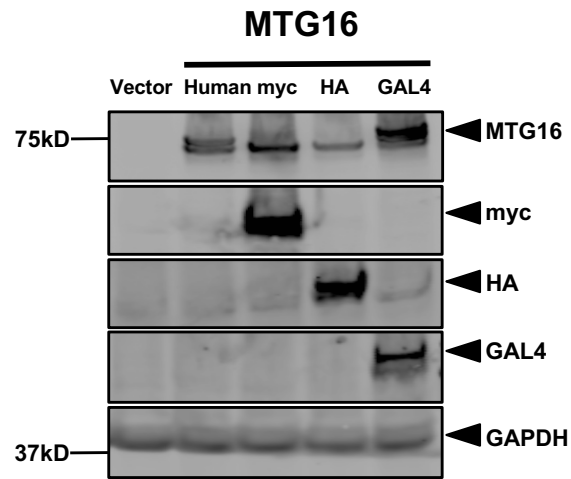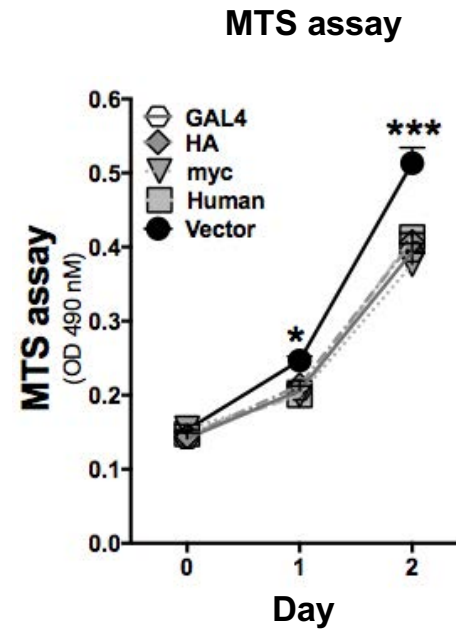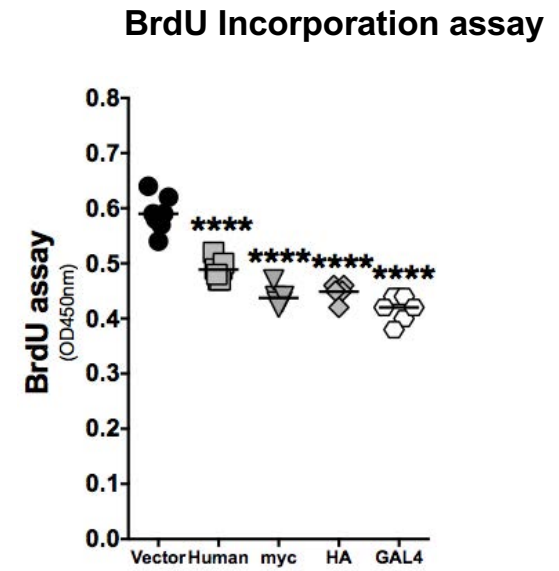

**Supplementary Table 1.** Clinical characteristics of Normal and Colorectal Cancer samples.

|                            | <b>Normal (n=5)</b>        | <b>CRC (n=102)</b>               |
|----------------------------|----------------------------|----------------------------------|
| <b>Average Age (s.d.)</b>  | 58 ± 8.2                   | 64 ± 14.9                        |
| <b>Gender</b>              | Male (n=3)<br>Female (n=2) | Female (n=53)<br>Male (n=49)     |
| <b>Race</b>                | White (n=5)<br>Black (n=0) | White (n=83)<br>Black (n=19)     |
| <b>Grade if applicable</b> | n/a                        | 1 (n=14)<br>2 (n=62)<br>3 (n=26) |



**Supplementary Table 2.** Clinical characteristics of Normal, Ulcerative colitis non-dysplastic (Control), UC with dysplasia, UC with colitis-associated cancer.

|                               | Normal (N=5) | UC Control (N=5) | UC Patients with Dysplasia (N=6) | UC Patients With Cancer (N=23)                                                                                                     |
|-------------------------------|--------------|------------------|----------------------------------|------------------------------------------------------------------------------------------------------------------------------------|
| <b>Average Age (s.d.)</b>     | 60.9 + 11.5  | 55+ 10.2         | 53.2 + 15.5                      | 51.4 + 18.3                                                                                                                        |
| <b>Tumor Grade</b>            | n/a          | n/a              | n/a                              | Grade 1 (N=3), Grade 2 (N=5), Grade 3 (N=12), Unknown (N=3)                                                                        |
| <b>Location if known</b>      | n/a          | n/a              | n/a                              | Descending (N=2), Transverse (N=3), Left (N=2), Ascending (N=1), Sigmoid (N=2), Rectum (N=6), Hepatic fixture (N=1), Unknown (N=5) |
| <b>Lymph Node Involvement</b> | n/a          | n/a              | n/a                              | Positive (N=10), Negative (N=11), Unknown (N=2)                                                                                    |
| <b>Average Tumor Size</b>     | n/a          | n/a              | n/a                              | 4.1 + 2.6 cm                                                                                                                       |
| <b>Mesenteric Deposits</b>    | n/a          | n/a              | n/a                              | Absent (N=11), Present (N=7), Unknown (N=5)                                                                                        |
